# Supplementary material
Source: publisher figshare collection journal article supplement (https://gsajournals.figshare.com/ndownloader/files/18059204)
Supplement: Supplementary file 1 [file 18059204]

## Sheet: Sheet1
Woodchuck ID	Human Ensembl id	Mouse Ensembl ID	Approved gene symbol	Approved gene name	Synonims	Woodchuck Protein sequence	Tymus (F9150)	Liver (F6852)	Liver (M4046)	Kidney (M4046)	Spleen (M4046)	Liver (M4075)	Kidney (M4075)	Spleen (M4075)	Liver (M4091)	Kidney (M4091)	Liver (F6849)	Spleen (M4091)	Kidney (F6849)	Spleen (F6849)	Heart (F6849)	Liver (F9150)	Kidney (F9150)	Spleen (F9150)	Pancreas (F9150)
Monax5E008963	ENSG00000174125	ENSMUSG00000044827	TLR1	toll-like receptor 1	rsc786, KIAA0012, CD281 4p14	MTGKNSSLFRFVIILVLVVKIKIQLSDESEFLVDRSNTGLTHIPKELSLETTTLDVSQNYISELQTSDILSLSKLRILIISHNRIQYLDISVFRFNQELEYLDLSHNKLRTISCHPAVNFKHLDLSFNMFEALPICKEFGSMSQLKFLGLSATQLEKSRVQPIAHLNISKILLVLGETYGEKEDPESLQDFNTDSLHIVFPVKKVFHFILDMSVSTAISLELSNIKCVLDSECSYFLSALVKLQNNPRLLNLTLNNIETTWNSFINILQSVWPTTIEYFSISNVKLQDQLDLRNFNYSHTSLKALSIHQVVSDVFNFPQSNIYKIFSNMNIQNVTVSGTHMIHMLCPSQISPFLHLDFSNNLLTDMVFKDCGNLIELKTLSLQMNQLKKLANIIHMTAE…	221	275	458	1388	17817	491	1854	11883	321	525	515	17138	1191	11050	294	276	869	10186	72
Monax5E014565	ENSG00000137462	ENSMUSG00000027995	TLR2	toll-like receptor 2	TIL4, CD282	MNSCRSLSARQLWPRCWWTGQTATCVTLPPTCATPGLRVLCCGVCCALFLLILFMGGLCPLPVGPAHGGLFHPFHGVWYGRDSHWVENLLVQELENWEPPFKLCLHKRDFVPGKWIIDNIIDCIEKSHKTVFVLSENFVRSEWCKYELDFSHFRLFDENRPFLSCWSPLRSHLS*	20	4	14	16	89	15	15	82	17	11	6	69	16	149	11	8	26	93	2
Monax5E015097	ENSG00000137462	ENSMUSG00000027995	TLR2	toll-like receptor 2	TIL4, CD282	MPRALWTVWALGAMILLSKEGSPDPAPLSCNPTGICDGRSRSFSSIPSGLTAAMRGLDLSNNEITYIGQADLQRCVNLRALMLKSNGISTIQEDAFSSLSHLEHLDLSDNQLSNLSSSWFRPLSSLKILNLLGNPYKTLGETSLFSHLPNLRILRVGNSYTFTGIQRIDFVGLTFLEELEIIASSLQSYEPQSLKSIQNISHLILHMKQPMLLVKIFVDLLSSVESFELRDTDLDMFHFSGLSVSETNPVIKKFTFRNVDMTDQSFNDLVKLLSYASELLEVEFDDCTLNGVGDFHVSELEKIKIPGKVETLTIRKLHIPKFYLFYDLSTVYSITERIKKITVENSKVFLVPCLFSQHLKSLEHLDLSENLMVEEYLKNSACEDGWPSLQTLILRQNHL…	1030	354	902	1586	7191	1253	2319	4640	909	1083	1048	3939	2074	20771	913	506	1234	11205	104
Monax5E004128	ENSG00000164342	ENSMUSG00000031639	TLR3	toll-like receptor 3	CD283	MRLHLPYHIYFFWGLWPHWILCTSSTNKCTVRHEEADCSHLKLTETPNDLPVNITTLDLSHNQLRRLPPANFTRYSQLTILDGGFNTISKFEPELCQNLPLLKILNLQHNELSHVSDTTFAFCLNLTELHLMSNSIQKIQNNPFKNQKNLIVLDLSHNGLSSTKLGTQLQLENLQELILSNNKIRALRSEEFDFLGNSSLRKLELSSNQIKQFSPGCFHAIGKLFGLSLNNVQLGPSLTEKLCLELSSTSIQNLSLSNIQLYRTSNVTFSGLKQTNLTTLNLSHNNLNVIGNNSFVWLSHLKYFFLEYNNIQHLSSHSFYGLSNVRYLNLKGSFTKQGISLASLPQIDDFSFQWLKCLEYLNMEDNNLPGIKSNMFTGLVNLRYLILSNSFTSLQTLTN…	588	108	290	724	2408	92	790	774	200	548	200	1176	1156	3902	206	120	784	1962	102
Monax5E010463	ENSG00000136869	ENSMUSG00000039005	TLR4	toll-like receptor 4	hToll, CD284, TLR-4, ARMD10	MIPPRSLAGTLIPAMAFLSCLRPESWEPCVEVEPNVTYQCMELNLSKIPNSIPSSAKNLDLSFNPLKCIDSHSFSSFPELEVLDLSRCEIQTIEDDAYEGLHNLSTLILTGNPIQSLGAGAFHGLSSLRTLVAVETKLTSLGNFPIEHLTNLEKLNVAHNLIHSFKLPEYFSNLPNLKHLDLSSNKIQNIFTMDLEALHKMPLLNLSLDLSLNPIDFIQPGAFKEIRLHELTLRSNFHSKNVMKTCIQGLAGLEVHRLVLGEFKNERNVEMVDKSVLEELCNLTIEEFRLAYIDNLARDVTDLLSCLANVSAMSLVSLNLNRVEEISTGFNWQSLELVKCQFEQFPKIVLPSLKRFTCIANKDLDSFGELKAPRLEHLDLSGNDLSFKSCCSHYHFGTT…	6502	6232	8696	10272	9234	5640	13502	6644	7222	14550	14932	4996	13456	22590	2698	4708	6900	9742	850
Monax5E035073	ENSG00000187554	ENSMUSG00000079164	TLR5	toll-like receptor 5	TIL3, FLJ10052, MGC126430, MGC126431	MRRIMADHLDLLLGVLLMASPVFGIPSCSSDGRIALFRFCNLTEIPPVLNTTERLLLSFNYIRTVTATSFPLLEQLQLLEIGSQFTPLSIDKEAFRNLPSLRILDLGKSQIDFLHPDAFQGLSHLFELRLFACGLSDVVLRDGYFRNLTSLIRLDLSYNEIGSLYLHPSFQELNSLKSIDFSFNQISILCEDELKPLQGKMLSLFRLKATYLYIRVSVDWEKCMNPFRNIRLETLDVSDNGWTVAITGNFSNAIRGSQISSLILTYHIMGSGFGFQNLKDPDENIFTGLERSSVKRLDLSHGYIFSLNPRLFKTLKDLKVLNLSYNKINRIADKAFYGLENLQILNISYNLLGELYNSNFEGLRSVAYIDLQKNHIGIIQDQTFRFLKELHTLDLRDNA…	40	90	554	38	12	814	98	12	1552	24	522	12	56	2	18	1892	102	26	6
Monax5E038840	ENSG00000174130	ENSMUSG00000051498	TLR6	toll-like receptor 6	CD286	MVRRTAALEENHCIMTPDKEPVVTNLWFFCIVILIVGIIVQVSGENELRVDMSKIGLTHVPKDLSPRTEVLDISQNYISELQISDFSFLSGLKVLRLYHNRIQRLDFSVFKFNRYLEYLDLSHNQLQKISCYPVVGVKHLDLSFNDFDALPICTEFGNLTQLNFLGLSAAKFQLLDLLPIAHLHLNYILLDLGGYYVKENEAESLQILNTKSLHFVFHPESLFSVQVNISVNTLGCLQLTNIKLNDENCQVLINFLLELIRGPTLLNFTLNHMETTWKCLVRVFRFLWPKPVEYLNIYNLTIVESINEEDFAYSETALKALKIEHIKNQVFIFSQTALYTVFSEMNIMMLTISDTPFIHMLCPQAPSTFKFLNFTQNVFTDSVFQNCSTLVQLETLILQ…	13	1	8	22	229	3	34	205	9	7	7	274	33	230	6	4	29	236	2
Monax5E017202	ENSG00000196664	ENSMUSG00000044583	TLR7	toll-like receptor 7	-	MVFPMWTLKRQFLILLNMILISKLLGDRWFPKTLPCDVTLDVPKNQVTVDCTDKHLTEIPEGIPANTTNLTLTINHIASISQDSFHRLDHLIEIDFRCNCIPPRMGPKNNVCTRRLQIKPKSFNKLTYLKSLYLDGNQLLEIPQDLPPSLQLLSLEANNIFSIMKENLTELASIEMLYLGQNCYYRNPCNVSFSIEKDAFLNLTNLKVLSLKDNNITAVPTVLPSNLIELYLYNNIITEIKKDDFSNLHQLQILDLSGNCPRCYNVPFPCTPCENNSPLKIHDNAFDALTELEVLHLHSNSLQNVPPAWFQKMKKLKELDLSQNFLAKEIGDAKFLHSLPNLIQLDLSFNYELQVYQAFINLSDAFSSLKKLKILRIQGYVFKELTSRNLSPLRDLRHL…	154	248	316	1124	8306	242	1716	7124	256	210	422	6806	1028	15794	380	260	186	6500	36
Monax5E006714	ENSG00000101916	ENSMUSG00000040522	TLR8	toll-like receptor 8	CD288	MSFWSSILICLFLLISDSCEFFAESNYSRSYPCDEKRQNNSIIAECDSRQLQEVPQTVGKYVTELDLSDNFITHITNESFPELPYVTKINLNHNANQEHYNKNPDMNKNGMNITDGAFLNLKNLQELLLEDNQLERIPFGLPESLRELSLIQNNIISITKNDTLGLMNLESLYLGWNCYFVCSETFYIEDGTFESLTNLKVLSLSFNTLIHVPPKLPNSLRKLYLSNTKIKTIGQEDFKGLVNLRLLDLSGNCPRCFNAPFPCTPCDGNAAIEIHPLAFQNLTQLLYLNLSSTSLRKVPSTWFDNMHYLKVLHLEFNYLVQEMASGEFLTKLPNLKILDLSFNYVKTEYSQYITLSENFSKLQSLKALHLRGYVFQTLREEDFRPLMVLPQLRTINLGI…	148	1872	228	108	2556	150	112	1428	164	8	2594	1568	118	20326	54	622	28	4794	16
Monax5E044607	ENSG00000239732	ENSMUSG00000045322	TLR9	toll-like receptor 9	CD289	MLAVALALGALPAFLPCEFQQGSLVNCNWLFLKSVPHFSVAAPRGNVTSLSLISNRIHHLHNFDFVHLPNLRRLNLKWNCPPISFSPMHFPCHMTIEPQTFLHATKLEDLNLSYNSITTVPALPKSLVNLTLSHTNILTLDHTSFAGLHALRFLYMDGNCYYSNPCSRAVEVAPDAFLSLRKLTHLSLKYNNLTAVPRNLPPSLEYLLLSYNHIVKLTSGDLANLTALRVLDVGGNCRRCDHARNPCVECPNISLQLDPDTFSKLSHLEGLVLKDSSLHTLDSTLFQGLRNLTVLDLSENFLYECITNTSAFRNLTQLSKLNLSFNYCKKVSFAHLHLEDSFENLISLQELNMNGIFFRSLNENTLKPLTHLPLLHTLHLQMNFINQAQLSIFGAFPGL…	18	18	30	174	3870	62	208	3234	2	48	46	4036	110	3164	32	54	40	2724	14
Monax5E019176	ENSG00000174123	-	TLR10	toll-like receptor 10	CD290	MKLIKNFYVFCNIVMSIEGLASKLPEEKELITNYSNMFLKKVPTDLTPTPTTLDLSYNLLFQVQNSDFHSLSKLKTLILCHNRIQQLDIKIFELNQELRYLDLSYNRLKTVTWYSLAGLRHLDLSFNDFDTVPICEEIGNMSHLEVLGLSGAKIQKSDFQKIAHLHLNTVLLGLRTLSYYEEGSLPILNTTELHIVLPRNTNFWVLLHDGLKTSKILEMTNIDCKSQCVRHETQQNLILKNAKTSILLFNKVDLLWDDLLLIFQFVWHTSVEYFQIQNITFGGNVYLDRNSFDYSNTVMKAIKLEHVHFRIFNIPQDRMYLLFTNMTIENLTISDAQMPHMLFPNYPVSFRYLNLANNILTDDLFKKPTQLPYLKTLILEGNKLETLSLVSSFVNSTPL…	14	22	12	164	3316	18	142	3266	22	20	18	4812	112	2280	24	2	44	2748	2
Monax5E029320	ENSG00000163599	ENSMUSG00000026011	CTLA4	cytotoxic T-lymphocyte-associated protein 4	CD152, CD, GSE, CD28, ICOS	MACLGFQRPEAGLEPAPRAWSCTALLSLLFIPIFSKAMHVAQPAVVLASSRGVASFVCEYAAFHKATEVRVTVLRQIASQVTEVCATTYTVENELTFLDDSSCTGTSSGNQVNLTIQGLRTADTGLYICKVELMYPPPYYMGLGNGTQIYVIEPEPCPDSDFLLWILAAVSSGLFFYSFLVTAVSLSKMLKKRSPLTTGVYVKMPPTEPECEKQFQPYFIPIERPL*	12	6	20	80	1432	10	62	1632	12	12	20	1422	30	414	10	10	8	726	0
Monax5E013036	ENSG00000188389	ENSMUSG00000026285	PDCD1	programmed cell death 1	CD279, PD1, hSLE1	MPDGLWARAQIRTKPAKEPRSSRAGVSMRGPSPSAQHPCDPIQGQARPPESQCSALSGGLATWSPGKEGQESSNRPSSLFSCSPTQLTVQEGANATFTCSFSNWSEHLVLNWYRLSPSKQNIKLASFRSGLSEPGRDPRFRVTQLPSRLDFHMSVISAQRSDSGLYLCGAISLSSKVQIQETTAAELRVTDRVLESPTLEPLPAHPRPSPRPAGQLPGLVVGVTSVLVGVPVLLLLAWVLATTCSTALPDAGGARSKEQPLEEASEVPVSTLDYGELDFQWRERTPTPEPPASCIHTEYATIVFPSSPGRRGSADSAQGPQPLRPEDGHCSWPL*	8	6	20	76	1412	24	86	1618	10	6	38	1848	28	1356	74	6	12	602	0
Monax5E010573	ENSG00000120217	ENSMUSG00000016496	CD274	CD274 molecule	B7-H, B7H1, PD-L1, PDL1, B7-H1	MIAVRVSFLPEEDISVLLDQLLSCHCKKMRMFNVFIFTSFCHLLNAFSITVPKDLYVVEYGSNVTIECKFPVEKQLDLGSLVVYWGKEDEEIIQFVNGKEDLKVQHSSYRQRAWLLKDQLYQGNAVLQITNVKLQDAGVYCCMISYGGADYKWITLKVNAPYREISQRISMDPVTSEYELTCQAEGYPEAEVIWTSSDHQILSAKTTITKSQREEKFFNVTSTLRINTTANEIFYCTFKRLSFTENNTAELVIPEPSTLLQRTHFVKLGAVLFCFGAALTILFCLRKNVRMLDVENGGIQDINSRKQNDTQFEET*	22	4	22	20	352	28	24	216	8	20	50	132	36	1658	42	10	6	476	4
Monax5E025743	ENSG00000135077	ENSMUSG00000020399	HAVCR2	hepatitis A virus cellular receptor 2	Tim-3, TIM3, FLJ14428, TIMD3, CD366	MFSHLSFNGILLLLLLLLLTMSSEGEYIVEVGQDASLPCSYNPISSESLVPVCWGKESCPVFGCKDLVLSTDETNVKDQKSSRYQLKGNLHKGDVSLTIVNVTPADSGTYCCRIQFRGPMNDYKLNVELIIKPGEWNLCMPSLCLRFTF*	20	2	4	34	130	6	40	106	6	0	10	24	34	332	4	0	14	142	2
Monax5E036760	ENSG00000089692	ENSMUSG00000030124	LAG3	lymphocyte-activation gene 3	CD223	MWEAQFLGLLLLQLLWVAPAEAPDPGKEVLVVWAQEGTPAHLPCRLTIPFQNPGLLRRGVVTWQHQPDSDPPAPTLSRPLSKSFASVVPSPRGMGPQRYTLLSVAPGGLRSGRLPLQPRFQLEERGLQRGDFSLWLRPVLLSDAGEYHAAVRLKDRTLACRLRLRVGQASMTASPTGSLRTSDWVILNCSFSRPDRPASVRWFRGQSQVPVQKSPHHHLAESFLFLPQVSPLDSGTWGCIITYSDGFNVSVMYNLTILGLEPSVPLTVYAGAGSRAELPCHLPPGVGTQSSLIAKWSPPGEGPDLLVAGDNGNFTLHLEAVSLAQAGTYTCHIHLQGQQLSATITLAVITVTPKLFGLPGSLGKLLCEVTPASGYERFVWNPMDRRSRSTPGPWLEMQE…	98	148	130	76	1092	178	96	1546	252	136	214	950	52	3104	12	200	130	752	28
Monax5E026588	ENSG00000101017	ENSMUSG00000017652	CD40	CD40 molecule, TNF receptor superfamily member 5	p50, Bp50	MSTELGGGSPDGWMVGDSSKWAVDREVSRNWVTRDLEAVVRSCDPFPFNQSQTREPEKAEDQTLSGNQNQPIVGFFSNVSSAFEKCHPWTSCETKDLVEHQPGTNVTDAICGFQSRTRALVVIPIVGVLLLAIFLVSLYIRESPGKVLKKPKDKAVHFPKAQGQDPVEIIFLDDVAPSPAAPVQETLHGCQPVTQEDGKESRVAVQERQ*	112	42	60	196	1526	68	430	1602	26	68	54	1882	166	1052	136	34	176	1142	24
Monax5E029159	ENSG00000102245	ENSMUSG00000031132	CD40LG	CD40 ligand	CD40L, TRAP, gp39, hCD40L, CD154	MIETYSQPTPRSVATGLPVSMKIFMCLLTVFLITQMIGSALFAVYLHRRLDKIEDERNLHEDFVFMKTIQRCNKGDGSLSLLNCEEIRSQFEGFVKDIMLNKEEKKKESVEMQKGDQNPQIAVHVVSEASKTASGKSHSI*	0	0	8	22	262	6	28	244	10	0	6	278	6	116	4	2	0	104	0
Monax5E009260	ENSG00000102245	ENSMUSG00000031132	CD40LG	CD40 ligand	CD40L, TRAP, gp39, hCD40L, CD154	MSNNLVTLENGKQLTVKREGLYYVYTQVTFCSNREALSQAPFIVSLCLKSSSESERILLRAATSHSSSKPCGQQSTHLGGVFELQSGASLFVNVTDPSQVSHGTGFTSFGLLKL*	0	2	2	20	244	4	24	264	2	0	6	296	4	80	2	2	2	100	2
Monax5E011996	ENSG00000121594	ENSMUSG00000008007	CD80	CD80 molecule	B7.1, B7-1	MDPILMWKTLPKVSWLMVLLAALFHFSSGISQVTKTVQGMAKLSCNYNISVDELSRVRIYWQKENKMVLSVISGRVQVWSQYQNRTIPEITNNLSLVILALRLSDRGTYTCVVQKTEKGSFRVEHLTSVMLSIKADFPTPSITDFEHPSPDLRRITCSTSGGFPKPYLFWLENGEEVKAVNTTVYQDPETELYTVYSNLDFNVTSNHSFVCLVKYGDLSVSQIFNWEKPKEDPPDDQLWKRKILIPVCVGITVILGTCFICILRMRMQRRNEEGVEMRTTARI*	44	24	44	112	1248	32	152	1024	22	46	64	1078	74	1702	38	30	38	844	8
Monax5E024595	ENSG00000114013	ENSMUSG00000022901	CD86	CD86 molecule	B7.2, B7-2	MDPRCTMGLRITLFVTAFLLSDVASLKSQASFNETADLPCQFINSQNISLGELIIFWQDQQKLVLYELYLGNEKPDNVAAKYLGRTSFDQDNWTMQLHNVQIKDKGSYQCIVHHKGPQGIVHLYQMTSELSVFANFSEPEIRPLSNITGDSGINLTCSSSQGHPPPLRIYFVLETQNSTVEHDGVMVISQDNETELYNVSASLSVPFPDDTSNVTITCFVCTASGTLKSPPFNTVLPTDSLARKDQTYLAAFGLLIILSMIFVVVLCLKKQKRRRRQQHQQTAGSSEETIKMESEETKERVEIHEPEQNDEEVQCIVHYSKTPLGNHNATHF*	72	34	70	160	1648	44	246	1438	40	148	96	1252	114	4234	38	48	58	1634	4
Monax5E028758	ENSG00000139193	ENSMUSG00000030336	CD27	CD27 molecule	S152, Tp55	MAWPPPCWLFILGTLAGISATPAPKRCPEKHYWAQGGLCCQMCEPGTFLVKDCDQHRKAARCDPCIPGVSFSPDHHTRPHCESCRHCNFGLLLSNCTITANTECGCPKDWQCRDKECTECDPSPNPSLTIHPSEALGPYPPPTHLPYTKKMPETGTVNHVQTPADFRQLPDPTLPTHLPSQRSLCSSDCIRVFVIFSGMFLVFALGGALFLQQRKYGSNKNESPLEPAESCSYSCPREEEGSTIPIQEDYRKPEPASYP*	40	60	58	254	7178	42	198	5550	44	16	80	6616	90	4434	50	28	36	4334	6
Monax5E045199	ENSG00000049249	ENSMUSG00000028965	TNFRSF9	tumor necrosis factor receptor superfamily, member 9	CD137, 4-1BB	MQDSIMRNGYYNVVATVLLVMNFERTRSVQDLCGICPAGTFCGKSKNQTCIPCPSNSYSSTGGQRACNICTKCEGYHRVKKPCSFTSDTECDCISGFHCLGAGCAMCDPDCKPGQELTADGCKDCSPGTFNDQEGGVCRPWTNCSLDGKSVREKGTKDSDVVCGPALPDISPGRSAQVLTFFLALTSAAVVFLLIFLVLRLSMVKWSRKKFLYIFKQPFIKPVQTAQEEDACSCRFPEEEEGGCEL*	320	48	522	174	1710	174	168	2178	362	168	114	1930	106	1980	310	194	106	2584	16
Monax5E033523	ENSG00000186827	ENSMUSG00000029075	TNFRSF4	tumor necrosis factor receptor superfamily, member 4	ACT35, OX40, CD134	MRMCAGAWGPAALLLLGLLLEVRAALNCVGDTYPNGQRCCQECQPGSGMVSRCEGPRDTVCLPCDPDSYNEAVNYEACKPCTQCNQRSGSELKKKCTPTQDTVCRCRPGTQPLDGFKPGVDCAPCPAGHFSPGDNKACKPWTNCTLTGKRTLKPGSMSSDTLCENRTSPGTLPWETQGPTARPTTALSTAALPGTSLGPSTPPSEARRGLPLAAVLGLGLSLLAPLAVLLALHLHGRAWRSSGGNSFRTPIQEEQPDAHSTLAKI*	21	2	46	143	1272	2	90	1606	14	18	28	1490	34	935	22	10	35	673	4
Monax5E007064	ENSG00000213809	ENSMUSG00000030149	KLRK1	killer cell lectin-like receptor subfamily K, member 1	NKG2D, KLR, NKG2-D, CD314	GYCGPCPKNWLCYRNHCYQFFNESKTWYQSQASCMSQNSSLLKIYSRVEQDFFKLVKSYHWIGLIQIPTNGSWQWEDGSILLPN	2	2	8	6	46	0	2	40	6	0	4	32	2	260	0	4	0	64	0
Monax5E041064	ENSG00000134545	ENSMUSG00000030167	KLRC1	killer cell lectin-like receptor subfamily C, member 1	NKG2-A, NKG2-B, CD159a	MPLVKHNYQSTVLDINSATEMSNQGVIYTELNLGKNPKKQRRKYKDIKSSISVTEEEITYADLNLRNSSQEHPGNDKDNHCKEFPSPPEKLTAGILGITCFVLMVTVVVMITVVIPSTVIQEENNSSLIGTQKAYHCRRCPKEWLTYSNNCYYISIEKVTWNESLVSCASKNSNLLYIDNEEEMVRF*	18	14	24	30	196	16	30	184	0	2	94	32	38	5854	20	10	8	542	0
Monax5E014725	ENSG00000134545	ENSMUSG00000030167	KLRC1	killer cell lectin-like receptor subfamily C, member 1	NKG2-A, NKG2-B, CD159a	SFLHSLSLLSWVGVFRKSKDHPWELINGSTFKLKVKESSDDQRNCAMLYSSELKSDSCESSNTYNCKHKL*	2	6	8	12	64	2	6	66	0	0	12	4	6	1446	12	0	6	152	0
Monax5E016667	ENSG00000122223	ENSMUSG00000004709	CD244	CD244 molecule, natural killer cell receptor 2B4	2B4, NAIL, NKR2B4, Nmrk, SLAMF4	MLGLAVTLLHLLLLKGHHGQGSPDSTYDVVGLSGRPLPLRPSNTQMEISSVQWKMQLLSCPETYVILTWRNNSTPTYEDLALKHFNNTLDFNFENLTLLIKAAKPQDSGHYKLEVTNESGKVNVVHFKVFVFDHVEQPLLQEQWKALEERKCQVVLSCLVSRDSNVTYTWYRDNELISTSGNFTYLEVSVDPNDQNTYTCNVSNPVSWASQTLNLTQGCLRVPLRSRILPFMVIVIILAILFIVTFTCFCVRKRKRKQSQTSPETPLTIYEDVKNPQMRRNEVWHSMGWGLSPLVWKLLFGEWPFRAGGQREMDIDPFKVILSPPPFLFSISFLVLARQEMRENKGSRENEREADMTCAVRRDEAQENPEGRGCSFLPRQHHGVLIAAQPLQMG*	54	26	42	34	1496	96	56	1712	36	26	106	506	68	10904	32	70	28	6378	0
Monax5E038566	ENSG00000182393, ENSG00000183709, ENSG00000197110	ENSMUSG00000060747, ENSMUSG00000059128	IFNL1, IFNL2, IFNL3	Interferon lambda 1,2, 3	IL29, IL28A, IL28B	MVRDPFVWLSWALLCRLIFALPCVLRCALAAGAVSVLVQEVWERPVALQAELALTLRVLGTMANATLGDVLDQPLHTLGHIQSQLQACALAQPTAGPRPQGRHRHRLSHWLQRLQQAPEKESPVCLEASVTFNLLRLLVRDLKCVASGHLCV*	0	0	0	0	0	0	0	0	0	0	0	0	0	0	0	0	0	0	0
Monax5E045009	ENSG00000182393, ENSG00000183709, ENSG00000197110	ENSMUSG00000060747, ENSMUSG00000059128	IFNL1, IFNL2, IFNL3	Interferon lambda 1,2, 3	IL29, IL28A, IL28B	MTLRKGTRDEAQERSFLGGLVAVGPVDTGCGLGLQGDSAQALPAVTLPLSGPEGAGGSQGAEGQLRPEMRPRSGAFWVALWLWVLWTLGVASDSRGTVPRRCLLSHYRFLDPKALAAVKALRDSYSCAGLRHVARSIADAQEVLRGLRHPEMLPGTDQTLQLLAAAGRDLETCPLTLSSRGPGAAAGCWLLLTLTSAVLTRTRAVPVPSPLSAHPDARDCDMAQFKTLAPRELQAFRKARDAFEESLLLKDLECRSPLLPRPWDLRQLQVWERPVALQAELALTLRVLGTMANSTLGDVLDQPLHTLGHIQSQLQACALAQPTAGPRPQGRHRHRLSHWLQRLQQAPEKESPVCLEASVTFNLLRLLVRDLKCVASGHLCV*	0	0	0	0	0	0	0	0	0	0	0	0	0	0	0	0	2	0	0
Monax5E016133	ENSG00000182393, ENSG00000183709, ENSG00000197110	ENSMUSG00000060747, ENSMUSG00000059128	IFNL1, IFNL2, IFNL3	Interferon lambda 1,2, 3	IL29, IL28A, IL28B	MELQGQSTLHHGDRSWGHCSTQTQGPRERAWTQPQPLTLSSRGPGAAAGCWLLLTLTSAVLTRTRAVPVPSPLSAHPDARDCDMAQFKTLAPRELQAFRKARDAFEESLLLKDLECRSPLLPRPWDLRQLQVWERPVALQAELALTLRVLGTMANSTLGDVLDQPLHTLGHIQSQLQACALAQPTAGPRPQGRHRHRLSHWLQRLQQAPEKVSGCQRTGLEQLALATAATEPLVPTGVPRLPRGLRHLQPPPPPGARPEVCGQWTPVRLTHTLLSRRGISGLICQRRHSLIYCPQPSTSPQPLVTCLRSAVGAGGSDCGVLVSWAEVRVSPGLPWDPAGSPPIRGQGPQAAPWCSGLRPLVALQQDGSLVLVLAPGTLPLRDQSCAPAWKTVLMLQESW…	0	0	0	0	0	0	0	0	0	0	0	0	0	0	0	0	0	0	2
Monax5E006056	ENSG00000182393, ENSG00000183709, ENSG00000197110	ENSMUSG00000060747, ENSMUSG00000059128	IFNL1, IFNL2, IFNL3	Interferon lambda 1,2, 3	IL29, IL28A, IL28B	MELQGQSTLHHGDRSWGHCSTQTQGPRERAWTQPQPLTLSSRGPGAAAGCWLLLTLTSAVLTRTRAVPVPSPLSAHPDARDCDMAQFKTLAPRELQAFRKARDAFEESLLLKDLECRSPLLPRPWDLRQLQVWERPVALQAELALTLRVLGTMANSTLGDVLDQPLHTLGHIQSQLQACALAQPTAGPRPQGRHRHRLSHWLQRLQQAPEKESPVCLEASVTFNLLRLLVRDLKCVASGHLCV*	0	0	0	0	0	0	0	0	0	0	0	0	0	0	0	0	0	0	0
Monax5E019686	ENSG00000184995	ENSMUSG00000045364	IFNE	Interferon epsilon	-	MIHKQFPGIVLVLLVFFVELKLVLLQQRIKEESLQLLNNLQTSSIQQCLPYRKNFRLPQNSVNFHQYPKGHVLAILHEMLQQIFNLFKKNISLGSGEENHIPIFLTDLHQQLEYLETLLGLEAEHKSHALGSKNLRLQVKAYFRRIHNYLESQRHSSCAWTIVHAEINRCLVFVFRLIRQEIDP*	0	0	2	0	0	0	4	0	0	0	0	0	0	0	0	0	0	0	0
Monax5E038533	ENSG00000184995	ENSMUSG00000045364	IFNE	Interferon epsilon	-	MIHKQFPGIVLVLLVFFVELKLVLLQQRIKEESLQLLNNLQTSSIQQCLPYRKNFRLPQNSVNFHQYPKGHVLAILHEMLQQIFNLFKKNISLGSGEEKHIPIFLTDLHQQLEYLETLLGLEAEHKSHALGSKNLRLQVKAYFRRIHNYLESQRHSSCAWTIVHAEINRCLVFVFRLIRQEIDP*	0	0	0	0	0	0	0	0	0	0	0	0	0	0	0	0	0	0	0
Monax5E034626	ENSG00000111537	ENSMUSG00000055170	IFNG	Interferon gamma	-	SAIRKGRSAKSFGPDQINTGATDFNVFGLTLSEMMKYTSYFLAFQLCIILGSSSCYSQDTVNKEIEDLKGYFNASNSNVSDGGSLFLDILDKWKEESDKKVIQSQIVSFYFKLFEHLKDNKIIQRSMDTIKGDLFAKFFNSSTNKLQDFLKVSQVQVNDLKIQRKAVSELKKVMNDLLPHSTLRKRKRSQSSIRGRRASK*	0	0	2	0	12	2	0	10	2	0	2	14	2	130	2	0	0	6	0
Monax5E043087	ENSG00000171855	ENSMUSG00000048806	IFNB1	Interferon, beta 1, fibroblast	IFB, IFF	MNNRCILQIVLLLCFPTTTLSLSYHLLGLQQSSSSLECQKLLQQLNGRPADCLSDRMDFKIPKEIKHPQQFQKEHAAFVIYEMLQDIFVIFTRNFSNTGWNETIVKDLRVELHQQMDLLETTLEKKLGEENKSWGNSRTILHLKSYYWRILRYLKAKQYSSCAWTMIRMELFWNFSFINRLMDHFQN*	0	2	0	0	0	0	4	0	0	4	2	0	2	0	0	0	0	0	0
Monax5E017147	ENSG00000171855	ENSMUSG00000048806	IFNB1	Interferon, beta 1, fibroblast	IFB, IFF	MNNRCILQPALLLCFSTTALSLRYNLLRLQQFNSSVECQKLLEQLNERPADCLSDRMDFKIPKEIKHPQQFQKAQAAFVIYEMLKDIFHVFERGYTSPGWNETIVKDLLAKLNHQMDLLNTTVVGKLGEENKSWAYSWTILRLKSYYVRIRTYLEAKEYSSCAWRVVREELYWNFSFINRLTDKFQN*	0	0	0	0	0	0	0	0	0	0	0	0	0	0	0	0	0	0	0
Monax5E037070	ENSG00000171855	ENSMUSG00000048806	IFNB1	Interferon, beta 1, fibroblast	IFB, IFF	MNNRCILQPALLLCFSTTALSLRYNLLRLQQFNSSVECQKLLEQLNERPAECLSDRMDFKIPKEIKHPQQFQKAQAAFVIYEMLKDIFHVFKKGYSNPDWNNTIVTDLLRELDHQMDLLNTMVVEKLGEENKSKAYSGTILRLKSYYVRIWMYLEAKEYSSCAWRVVRDELYWNFSFINRLTDKFQN*	0	0	0	0	0	0	0	0	0	0	0	0	0	0	0	0	0	0	0
Monax5E022437	ENSG00000171855	ENSMUSG00000048806	IFNB1	Interferon, beta 1, fibroblast	IFB, IFF	MNNRCILQPALLLCFSTTALSLRYNLLRLQQFNSSVECQKLLEQLNERPAECLSDRMDFKIPKEIKHPQQFQKAQAAFVIYEMLKDIFHVFKKGYYNPDWNNTIVTDLLRELHQQMVLLNTMVVEKLGEENKRQAYSMIILRLKSYYVRIRMYLEAKEYSSCAWRVVREELYWNFSFINRLTDNFQN*	0	0	0	0	0	0	0	0	0	0	0	0	0	0	0	0	0	0	0
Monax5E021645	ENSG00000171855	ENSMUSG00000048806	IFNB1	Interferon, beta 1, fibroblast	IFB, IFF	MNNRCILQPALLLCFSTTALSLRYNLLRLQQFNSSVECQKLLEQLNERPAECLSDRMDFKIPKEIKHPQQFQKAQAAFVIYEMLKDIFHVFKKSYYNPDWNNTIVTDLLRELHQQMVLLNTMVVEKLGEENKRQAYSMIILRLKSYYVRIRMYLEAKEYSSCAWTVVREELYWNFSFINRLTDKFQN*	0	0	0	0	0	0	0	0	0	0	0	0	0	0	0	0	0	0	0
Monax5E037149	*	**	IFNA1, IFNA2,IFNA4,IFNA5,IFNA6,IFNA7,IFNA8,IFNA10,IFNA13,IFNA14,IFNA16,IFNA17,IFNA21	Interferon alpha 1, 2, 4, 5, 6, 7, 8, 10, 13, 14, 16, 17, 21	IFL, MGC142200	MRRIPTFSCLNYRKDFAFSQEQLEGEQVQKAQVVAVLHDMTQQVFNLFSTQEAFAAWNKTLLVTFLSGLHQQLDDLKACGTQQVEVEEAPLRAVRKYFYKITVYLKEKKYQPCAREVVRAEIMKSFSSSANLYGRLRSMEWDLVQQGNASH*	0	0	0	0	0	0	0	0	0	0	0	0	0	0	0	0	0	0	0
Monax5E030919	*	**	IFNA1, IFNA2,IFNA4,IFNA5,IFNA6,IFNA7,IFNA8,IFNA10,IFNA13,IFNA14,IFNA16,IFNA17,IFNA21	Interferon alpha 1, 2, 4, 5, 6, 7, 8, 10, 13, 14, 16, 17, 21	IFL, MGC142200	MALPLAFLLALMVFNCKSTCTLGCDLPQIHNLGLETSDGNEVGALTLLEKMRKIRTFSCLNYRKDFAFPQEQLEGEQVQKTQAVAVLHEMTHQIFNLFSTQEAFAAWDKTLLDTFLTGLHQQLDDLKACGTQQVGVEEAPLRAVRKYFHRITVYLKEKKYLPCAWEVVRAEIMKSFSSSANLYGRLRSME*	0	0	0	0	6	0	0	2	0	0	0	0	0	4	0	0	0	2	0
Monax5E025191	*		IFNA1, IFNA2,IFNA4,IFNA5,IFNA6,IFNA7,IFNA8,IFNA10,IFNA13,IFNA14,IFNA16,IFNA17,IFNA21	Interferon alpha 1, 2, 4, 5, 6, 7, 8, 10, 13, 14, 16, 17, 21	IFL, MGC142200	MALPLPFLLALVVLSRKNTCSLGYDLPQIHNLGLETPEKNEGGSLTLLKNMRRIPIFSCLNYIKDFAFPQEQLEGEQVQKAQAIAIANSIYFPLQ*	0	0	0	0	0	0	0	0	0	0	0	0	0	0	0	0	0	0	0
Monax5E042747	*		IFNA1, IFNA2,IFNA4,IFNA5,IFNA6,IFNA7,IFNA8,IFNA10,IFNA13,IFNA14,IFNA16,IFNA17,IFNA21	Interferon alpha 1, 2, 4, 5, 6, 7, 8, 10, 13, 14, 16, 17, 21	IFL, MGC142200	MALPLPFLLALVVLSCKNTYSLGCDLPQIHNQGLETPEKNEGGSLTLLKNMRRIPIFSCLNYRKDFAFPQEQLEGEQVQKAQAVAVLHEMTQQIFNLFSTQKAFAVWDKTLLDTFLSGLYQLLDDLKACGSKQVGVEEAVRKYFHRITVYLKEKKYLPCAWEVVRAEIMKSFSSSANLYGRLRSME*	0	0	0	0	0	0	0	0	0	0	0	0	0	0	0	0	0	0	0
Monax5E022094	*		IFNA1, IFNA2,IFNA4,IFNA5,IFNA6,IFNA7,IFNA8,IFNA10,IFNA13,IFNA14,IFNA16,IFNA17,IFNA21	Interferon alpha 1, 2, 4, 5, 6, 7, 8, 10, 13, 14, 16, 17, 21	IFL, MGC142200	MALPLPFLLALVVLSCKNTYSLGCDLPQIHNQGLETPEKNEGGSLTLLKNMRRIPIFSCLNYRKDFAFPQEQLEGEQVQKAQAVAVLHEMTQQIFNLFSTQKAFAVWDKTLLDTFLSGLYQLLDDLKACGSKQVGVEEAVRKYFHRITVYLKEKKYLPCAWEVVRAEIMKSFSSSANLYGRLRSME*	0	0	0	0	0	0	0	0	0	0	0	0	0	0	0	0	0	0	0
Monax5E004606	*		IFNA1, IFNA2,IFNA4,IFNA5,IFNA6,IFNA7,IFNA8,IFNA10,IFNA13,IFNA14,IFNA16,IFNA17,IFNA21	Interferon alpha 1, 2, 4, 5, 6, 7, 8, 10, 13, 14, 16, 17, 21	IFL, MGC142200	MALPLAFLLALVVLSCKSICSLGCDLPQIHNLGLETSEENEEGALTLLEKMRRIPIFSCLNYRKDFAFPQEQLEGEQVQKAQAVAVLHQMTQQILNLFSTQKAFAAWDKTLLDTFLSGLYQLLDDLKACGSKQVGVEEAVRKYFHRITVYLKEKKYLPCAWEVVRTEIMKSFSLSVNLYERLRSMEGDLVQQGNASH*	0	0	0	0	0	0	0	0	0	0	0	0	0	0	0	0	0	0	0
Monax5E022532	*		IFNA1, IFNA2,IFNA4,IFNA5,IFNA6,IFNA7,IFNA8,IFNA10,IFNA13,IFNA14,IFNA16,IFNA17,IFNA21	Interferon alpha 1, 2, 4, 5, 6, 7, 8, 10, 13, 14, 16, 17, 21	IFL, MGC142200	MALPLAFLLALVVLSCKNTCSLGCDLPQIHNLGLETSEENEEGALTRLEKMRRIPIFSCLNYRKDFAFPQEQLEGEQVQKAQAVAVLHQMTQQILNLFSTQKAFAAWDKTLLDTFLSGLYQLLDDLKACGSKQVGVEEAVRKYFHRITVYLKEKKYLPCAWEVVRTEIMKSFSLSVNLYERLRSME*	0	0	0	0	0	0	0	0	0	0	0	0	0	0	0	0	0	0	0
Monax5E016047	*		IFNA1, IFNA2,IFNA4,IFNA5,IFNA6,IFNA7,IFNA8,IFNA10,IFNA13,IFNA14,IFNA16,IFNA17,IFNA21	Interferon alpha 1, 2, 4, 5, 6, 7, 8, 10, 13, 14, 16, 17, 21	IFL, MGC142200	MALPLAFLLALVVLSCKNTCSLGCDLPQIHNLGLETSEENEEGALTRLEKMRRIPIFSCLNYRKDFAFPQEQLEGEQVQKAQAVAVLHQMTQQILNLFSTQKAFAAWEKTLLDTFLSGLYQLLDDLKACGSKQVGVEEAVRKYFHRITFYLKEKKYLPCAWEVVRTEIMKSFSLSVNLYERLRSME*	0	0	0	0	0	0	0	0	0	0	0	0	0	0	0	0	0	0	0
Monax5E008598	*		IFNA1, IFNA2,IFNA4,IFNA5,IFNA6,IFNA7,IFNA8,IFNA10,IFNA13,IFNA14,IFNA16,IFNA17,IFNA21	Interferon alpha 1, 2, 4, 5, 6, 7, 8, 10, 13, 14, 16, 17, 21	IFL, MGC142200	MALPLTFLLALVVLSCKSMCSLGCELPQIHNLGLEIPEKNEEGSLTLLEKMRRIPTFSCLNYRKDFAFPQKLLEGEQVQKAQAVAVLHQMTQQVFNLFSTQEAFAAWDKTFLDTFLTGLYQQLDDLKACGTQQVGEEEAPLRAVRKYFHRITVYLKEKKYLPCAWEVVRAEIMKSFFSSANLYGRLRSME*	0	0	0	0	0	0	0	2	0	0	0	0	0	0	0	0	0	0	0
Monax5E044031	*		IFNA1, IFNA2,IFNA4,IFNA5,IFNA6,IFNA7,IFNA8,IFNA10,IFNA13,IFNA14,IFNA16,IFNA17,IFNA21	Interferon alpha 1, 2, 4, 5, 6, 7, 8, 10, 13, 14, 16, 17, 21	IFL, MGC142200	MALPLAFLLALVVLSCKNTCSLGCDLPQIHNLGLETPEKNEEGALTLLQKMRRIPTFCCLNDRKDFAFPQKLLEGEKVPRAQAVAVLQEMTHQIFRLFGTQEAFAAWNKTLLDTFLSGLHQHLEYLKACVTHQVRQQKALGITVRKYFRRITDYLKENEYLPCAWEMVRTEIMKFLSSSPKLYERLRSMERDLVQQGNASP*	0	0	0	0	0	0	0	0	0	0	0	0	0	0	0	0	0	0	0
Monax5E042936	*		IFNA1, IFNA2,IFNA4,IFNA5,IFNA6,IFNA7,IFNA8,IFNA10,IFNA13,IFNA14,IFNA16,IFNA17,IFNA21	Interferon alpha 1, 2, 4, 5, 6, 7, 8, 10, 13, 14, 16, 17, 21	IFL, MGC142200	MALPLPFLLALWCSAKLLESEQVQKAQTVTILHEMTQQVFNLLSTQEAFAAWDKTLLDTFLTGLHQQLDDLKACGTQQVGVEEAPLRAVRKYFHRITVYLKEKKYLPCAWEVVRAEIMKSFSSSANLYERLRSMEWDLVQQGNASH*	0	0	0	0	0	0	0	0	0	0	0	0	0	0	0	0	0	0	0
Monax5E002982	*		IFNA1, IFNA2,IFNA4,IFNA5,IFNA6,IFNA7,IFNA8,IFNA10,IFNA13,IFNA14,IFNA16,IFNA17,IFNA21	Interferon alpha 1, 2, 4, 5, 6, 7, 8, 10, 13, 14, 16, 17, 21	IFL, MGC142200	MTQQIFNLLSTQEAFAAWEKTLLDTFITDLYQHLDDLKECGTQQVGVEEAPLRAVRKYFHRITVYLKEKKYLPCAWEVVRTEIMKSFSSSANLYGRLRSME*	0	0	0	0	0	0	0	0	0	0	0	0	0	0	0	0	0	0	0
Monax5E045328	*		IFNA1, IFNA2,IFNA4,IFNA5,IFNA6,IFNA7,IFNA8,IFNA10,IFNA13,IFNA14,IFNA16,IFNA17,IFNA21	Interferon alpha 1, 2, 4, 5, 6, 7, 8, 10, 13, 14, 16, 17, 21	IFL, MGC142200	MALPLPFLLALVVLSCKNTCSLGCDLPQIHNLGLETPDRNEEGTWMVLEKMRRIPTFSCLKYRKDFAFPKEQLEGEQVQKAQAVAVLHEMTQQIFNLFSTQEASAAWDKTLLDTFLTGLHQHLDDLKACGTQQVGVEEAPLRAVRKYFHRITVYLKEKKYLPCAWEVVRTEIMKSFSSSANLYGRLRSME*	0	0	0	0	2	0	0	0	0	0	0	0	0	0	0	0	0	0	0
Monax5E014546	*		IFNA1, IFNA2,IFNA4,IFNA5,IFNA6,IFNA7,IFNA8,IFNA10,IFNA13,IFNA14,IFNA16,IFNA17,IFNA21	Interferon alpha 1, 2, 4, 5, 6, 7, 8, 10, 13, 14, 16, 17, 21	IFL, MGC142200	MALPLPFLLALVVLSCKSTCSLGCDLPQIHNLGLETPDRNEEGTWTLLEKMRRIPTFSCLNYRKDFSFPQKQLQGEQVQKAQAVAVLHEMTQQIFNLFSTQEAFAAWNKTLLDTFLTGLHQQLDDLKACGTQQVGVEEAPLRAVRKYFHRITVYLKEKKYLPCAWEVVRAEIMKSFSSSPNLYGRLRSMEWDLVQQGNASH*	0	0	0	0	0	0	0	0	0	0	0	0	0	0	0	0	0	0	0
Monax5E027104	*		IFNA1, IFNA2,IFNA4,IFNA5,IFNA6,IFNA7,IFNA8,IFNA10,IFNA13,IFNA14,IFNA16,IFNA17,IFNA21	Interferon alpha 1, 2, 4, 5, 6, 7, 8, 10, 13, 14, 16, 17, 21	IFL, MGC142200	MRRIPTFSCLNCRKEFAFSLEQLEGEQVQKAQAVAVLHEMTQQVFNLFSTQEAFAAWNKTLLDTFLTGLHQQLDDLKDCGTQQVGVEEAPLRAVRKYFHRITVYLKEKKYLPCAWEVVRAEIMKSFSSSANLYGRIGSM*	0	0	0	0	0	0	0	0	0	0	0	0	0	0	0	0	0	0	0
*ENSG00000197919, ENSG00000188379, ENSG00000236637, ENSG00000147873, ENSG00000120235, ENSG00000214042, ENSG00000120242, ENSG00000186803, ENSG00000233816, ENSG00000228083, ENSG00000147885, ENSG00000234829, ENSG00000137080
**ENSMUSG00000078644, ENSMUSG00000070904, ENSMUSG00000078354, ENSMUSG00000070906, ENSMUSG00000078353, ENSMUSG00000073812, ENSMUSG00000073811, ENSMUSG00000089770, ENSMUSG00000076440, ENSMUSG00000070903, ENSMUSG00000070907, ENSMUSG00000078641, ENSMUSG00000078355, ENSMUSG00000063376
